# Supplementary material
Source: PubMed Central journal article supplement (PMC1748079)
Supplement: tobcont_14_4_227__1.pdf [file tobcont_14_4_227__1.pdf]

**Appendix table 1. CCR by husband's smoking (Reproduced from selected lines of Lee's table 3)**

| Index of husband's smoking                    | Level | n   | Median CCR (ng/mg) |
|-----------------------------------------------|-------|-----|--------------------|
| Current smoker                                | No    | 127 | 17.98              |
|                                               | Yes   | 137 | 11.51              |
|                                               |       |     |                    |
| Cigarettes smoked daily at home<br>(workdays) | 1-5   | 49  | 10.93              |
|                                               | 6-10  | 52  | 16.38              |
|                                               | 11+   | 28  | 5.74               |

Appendix Table 2. Variation in CCR (ng/mg) by number of cigarettes smoked and various indices of ETS exposure (Reproduced from the bottom lines of Lee's table 5)

| Base                  | Index of exposure          | Level | n   | Median CCR (ng/mg) |
|-----------------------|----------------------------|-------|-----|--------------------|
| Confirmed non-smokers | Working in preceding week  | No    | 122 | 16.72              |
|                       |                            | Yes   | 168 | 14.49              |
|                       |                            |       |     |                    |
|                       | Any exposure (home + work) | No    | 55  | 17.56              |
|                       |                            | Yes   | 235 | 14.74              |

Appendix Table 3.

Difference between self-reported smoking status and food intake frequency and lifestyle.

|                              | current | passive | non | $X^2$ test p-value        |
|------------------------------|---------|---------|-----|---------------------------|
|                              |         |         | P-N | P-N adjusted <sup>†</sup> |
| <u>Food intake frequency</u> |         |         |     |                           |
| Eggs                         |         |         |     | 0.605 0.818               |
| -1/w                         | 15      | 21      | 19  |                           |
| 1/w                          | 65      | 48      | 45  |                           |
| 2+/w                         | 19      | 31      | 36  |                           |
| Dark green vegetables        |         |         |     | 0.164 0.191               |
| -1/wk                        | 17      | 9       | 5   |                           |
| 2-3/wk                       | 51      | 34      | 30  |                           |
| 1/day                        | 28      | 47      | 47  |                           |
| 2+/day                       | 4       | 10      | 17  |                           |
| Carrot                       |         |         |     | 0.069 0.094               |
| -1/wk                        | 26      | 20      | 10  |                           |
| 2-3/wk                       | 59      | 54      | 57  |                           |
| +1/day                       | 15      | 27      | 33  |                           |
| Smoked fish                  |         |         |     | 0.033 0.092               |
| no                           | 43      | 63      | 61  |                           |
| less than 1/w                | 21      | 24      | 23  |                           |
| 1/w                          | 23      | 10      | 7   |                           |
| more than 2/w                | 13      | 2       | 10  |                           |
| Fruits                       |         |         |     | 0.080 0.066               |
| -1/wk                        | 14      | 7       | 5   |                           |
| 2-3/wk                       | 37      | 24      | 18  |                           |
| 1/day                        | 40      | 52      | 49  |                           |
| 2+/day                       | 9       | 18      | 29  |                           |

|       |               |    |    |    |       |       |
|-------|---------------|----|----|----|-------|-------|
| Juice |               |    |    |    | 0.042 | 0.038 |
|       | no            | 18 | 31 | 43 |       |       |
|       | less than 1/w | 18 | 24 | 16 |       |       |
|       | 1/w           | 8  | 15 | 11 |       |       |
|       | 2-3/w         | 33 | 15 | 20 |       |       |
|       | every day     | 23 | 16 | 10 |       |       |

|        |        |    |    |    |       |       |
|--------|--------|----|----|----|-------|-------|
| Coffee |        |    |    |    | 0.367 | 0.606 |
|        | no     | 4  | 15 | 18 |       |       |
|        | -3/wk  | 10 | 34 | 26 |       |       |
|        | 1/day  | 27 | 26 | 33 |       |       |
|        | +2/day | 59 | 25 | 23 |       |       |

### Lifestyle

|                               |     |    |    |    |       |       |
|-------------------------------|-----|----|----|----|-------|-------|
| Taking breakfast with husband |     |    |    |    | 0.009 | 0.010 |
|                               | yes | 47 | 63 | 76 |       |       |
|                               | no  | 53 | 37 | 24 |       |       |

|                           |     |    |    |    |       |       |
|---------------------------|-----|----|----|----|-------|-------|
| Taking lunch with husband |     |    |    |    | 0.058 | 0.048 |
|                           | yes | 8  | 13 | 21 |       |       |
|                           | no  | 92 | 87 | 79 |       |       |

|         |        |    |    |    |       |       |
|---------|--------|----|----|----|-------|-------|
| Cooking |        |    |    |    | 0.187 | 0.304 |
|         | boiled | 33 | 46 | 56 |       |       |
|         | fried  | 54 | 47 | 39 |       |       |
|         | baked  | 13 |    |    |       |       |

|               |                      |    |    |    |       |       |
|---------------|----------------------|----|----|----|-------|-------|
| Cooking hours |                      |    |    |    | 0.880 | 0.974 |
|               | less than 30 minutes | 23 | 6  | 7  |       |       |
|               | 21-60 minutes        | 36 | 31 | 27 |       |       |
|               | 61-90 minutes        | 18 | 33 | 35 |       |       |
|               | 91 minutes and over  | 23 | 30 | 32 |       |       |

|                                      |    |    |    |       |       |
|--------------------------------------|----|----|----|-------|-------|
| Ventilation hours                    |    |    |    | 0.328 | 0.266 |
| less than 15 minutes                 | 12 | 9  | 9  |       |       |
| 16-90 minutes                        | 49 | 36 | 28 |       |       |
| 91 minutes and over                  | 40 | 55 | 63 |       |       |
| <br>                                 |    |    |    |       |       |
| Vehicle at the time when they go out |    |    |    | 0.730 | 0.694 |
| bicycle                              | 53 | 58 | 63 |       |       |
| car                                  | 40 | 22 | 20 |       |       |
| others                               | 6  | 19 | 18 |       |       |
| <br>                                 |    |    |    |       |       |
| Hours husband at home                |    |    |    | 0.351 | 0.242 |
| less than 8 hours                    | 29 | 15 | 12 |       |       |
| 9-12 ours                            | 46 | 56 | 55 |       |       |
| 13-20 hours                          | 22 | 24 | 23 |       |       |
| 21 hours and over                    | 3  | 5  | 10 |       |       |
| <br>                                 |    |    |    |       |       |
| Income (ten thousand yen)            |    |    |    | 0.932 | 0.795 |
| less than 500                        | 45 | 22 | 20 |       |       |
| 501-700                              | 22 | 25 | 24 |       |       |
| 701-900                              | 9  | 15 | 18 |       |       |
| 901 and over                         | 19 | 18 | 16 |       |       |
| missing                              | 5  | 20 | 22 |       |       |

---

Originally 24 food items and 30 lifestyle items were compared among active smoker, passive smoker, and neither active nor passive smokers and between the latter two. Items showing some significant difference in these comparisons were presented.

Number indicates percentile.

P-N: comparison between non-smoker with and without ETS exposure

<sup>†</sup> p value when excluding non-smokers whose CCR value was over the relevant cut-off level of CCR 100ng/mg
